# Supplementary material for: Physical-Chemical and Structural Stability of Poly(3HB-co-3HV)/(ligno-)cellulosic Fibre-Based Biocomposites over Successive Dishwashing Cycles
Source: MDPI journal article supplement (doi:10.3390/membranes12020127), 2022-01-21
Supplement: s1 [file s1]

# Physical-Chemical and Structural Stability of Poly(3HB-co-3HV)/(ligno-)cellulosic Fibre-Based Biocomposites over Successive Dishwashing Cycles

Estelle Doineau, Fleur Rol, Nathalie Gontard and H  l  ne Angellier-Coussy \*

JRU IATE 1208, INRAE, Montpellier SupAgro, University of Montpellier, CEDEX 02, 34 060 Montpellier, France; estelle.doineau@umontpellier.fr (E.D.); fleur.rol15@gmail.com (F.R.); nathalie.gontard@inra.fr (N.G.)  
\* Correspondence: helene.coussy@umontpellier.fr

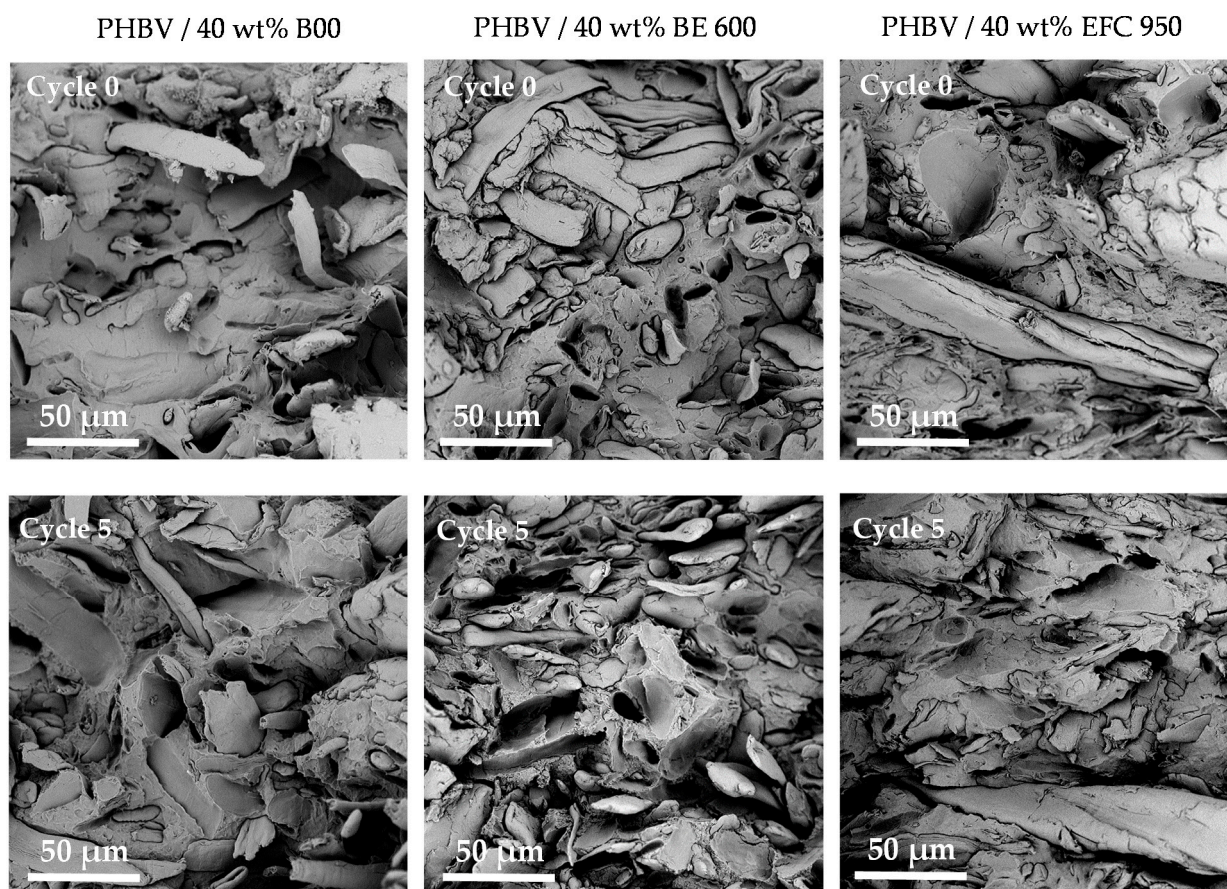

**Figure S1:** SEM images of cryofractured cross-sections of PHBV/(ligno-)cellulosic fibre-based biocomposite films PHBV/40 wt% B00, PHBV/40wt% BE 600 and PHBV/40 wt% EFC 950 before the dishwasher (cycle 0) and after 5 dishwashing cycles ( $\times 1500$  magnification).

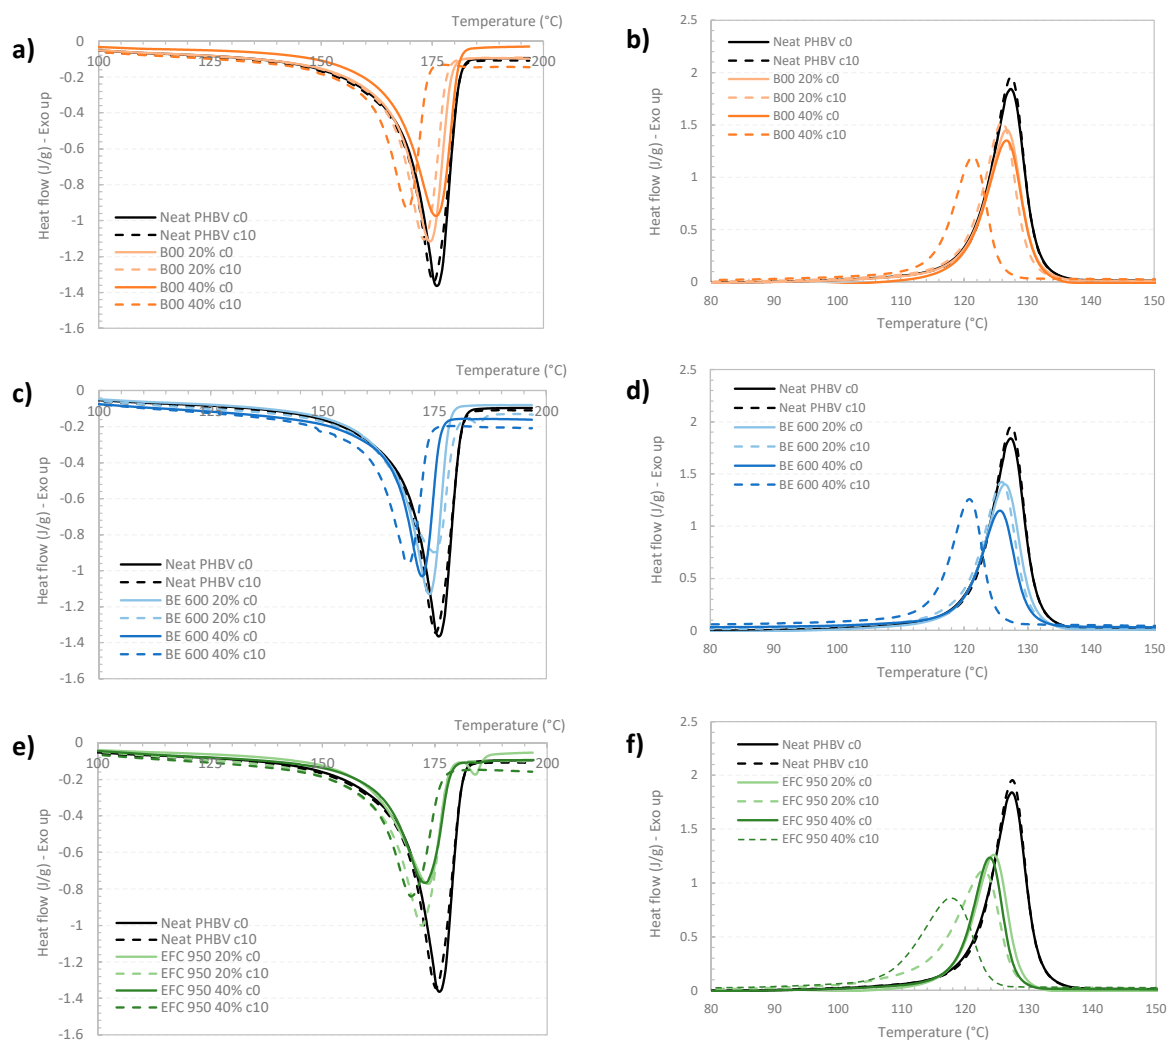

**Figure S2:** Thermograms obtained by Differential Scanning Calorimetry of the different prepared PHBV and PHBV-based biocomposite materials at 20 wt% and 40 wt% filler content and after 0 or 10 dishwashing cycles: (a,c,e) first heating scan and (b,d,f) cooling scan.
